# Supplementary material for: Increases in Inpatient Psychiatry Beds Operated by Systems, For-Profits, and Chains, 2010–2016
Source: Atypon-hosted journal article supplement (doi:10.1176/appi.ps.202100182), 2021-08-26
Supplement: appi.ps.202100182.ds001.pdf [file appi.ps.202100182.ds001.pdf]

Supplemental Material A

| <b>Output for A. Percent Change Relative to 2010, Hospital Counts, Bed Counts</b> |             |             |             |             |             |             |             |                         |
|-----------------------------------------------------------------------------------|-------------|-------------|-------------|-------------|-------------|-------------|-------------|-------------------------|
| <b>Years</b>                                                                      | <b>2010</b> | <b>2011</b> | <b>2012</b> | <b>2013</b> | <b>2014</b> | <b>2015</b> | <b>2016</b> | <b>Change 2010-2016</b> |
| Total hospitals (N)                                                               | 1787        | 1,768       | 1,771       | 1,751       | 1,767       | 1,771       | 1,783       | -4                      |
| Total beds (N)                                                                    | 112,182     | 110,118     | 111,565     | 112,613     | 112,227     | 112,531     | 111,184     | -998                    |
| PERCENT Change in hospitals relative to 2010                                      | 0.0%        | -1.1%       | -0.9%       | -2.0%       | -1.1%       | -0.9%       | -0.2%       |                         |
| PERCENT Change in beds relative to 2010                                           | 0.0%        | -1.8%       | -0.5%       | 0.4%        | 0.0%        | 0.3%        | -0.9%       |                         |
|                                                                                   |             |             |             |             |             |             |             |                         |
| <b>Output for B. Percent Change in Beds by System Ownership</b>                   |             |             |             |             |             |             |             |                         |
| <b>Years</b>                                                                      | <b>2010</b> | <b>2011</b> | <b>2012</b> | <b>2013</b> | <b>2014</b> | <b>2015</b> | <b>2016</b> | <b>Change 2010-2016</b> |
| System-Owned Beds (N)                                                             | 39,689      | 46,222      | 46,747      | 49,045      | 49,436      | 52,329      | 55,492      | 15803                   |
| Non-System Beds (N)                                                               | 72,493      | 63,896      | 64,818      | 63,568      | 62,791      | 60,202      | 55,692      | -16801                  |
| Percent Change in System-Owned Beds Relative to 2010                              | 0.0%        | 16.5%       | 17.8%       | 23.6%       | 24.6%       | 31.8%       | 39.8%       |                         |
| Percent Change in Non-System Beds Relative to 2010                                | 0.0%        | -11.9%      | -10.6%      | -12.3%      | -13.4%      | -17.0%      | -23.2%      |                         |
|                                                                                   |             |             |             |             |             |             |             |                         |
| <b>Output for C. Percent Change in Beds by Profit Status</b>                      |             |             |             |             |             |             |             |                         |
| <b>Years</b>                                                                      | <b>2010</b> | <b>2011</b> | <b>2012</b> | <b>2013</b> | <b>2014</b> | <b>2015</b> | <b>2016</b> | <b>Change 2010-2016</b> |
| For Profit Beds (N)                                                               | 15,059      | 17,994      | 19,155      | 19,825      | 21,369      | 22,518      | 23,631      | 8572                    |
| Not For Profit Beds (N)                                                           | 36,032      | 34,035      | 33,736      | 34,301      | 33,964      | 33,906      | 34,098      | -1934                   |
| Public Beds (N)                                                                   | 47,850      | 45,081      | 45,748      | 45,654      | 44,031      | 43,516      | 42,719      | -5131                   |
| Percent Change in For Profit Beds Relative to 2010                                | 0.0%        | 19.5%       | 27.2%       | 31.6%       | 41.9%       | 49.5%       | 56.9%       |                         |
| Percent Change in Not For Profit Beds Relative to 2010                            | 0.0%        | -5.5%       | -6.4%       | -4.8%       | -5.7%       | -5.9%       | -5.4%       |                         |
| Percent Change in Public Beds Relative to 2010                                    | 0.0%        | -5.8%       | -4.4%       | -4.6%       | -8.0%       | -9.1%       | -10.7%      |                         |

## Hospitals and Beds Providing Inpatient Psychiatry, 2010-2016

A. Percent Change Relative to 2010, Hospital Counts, Bed Counts

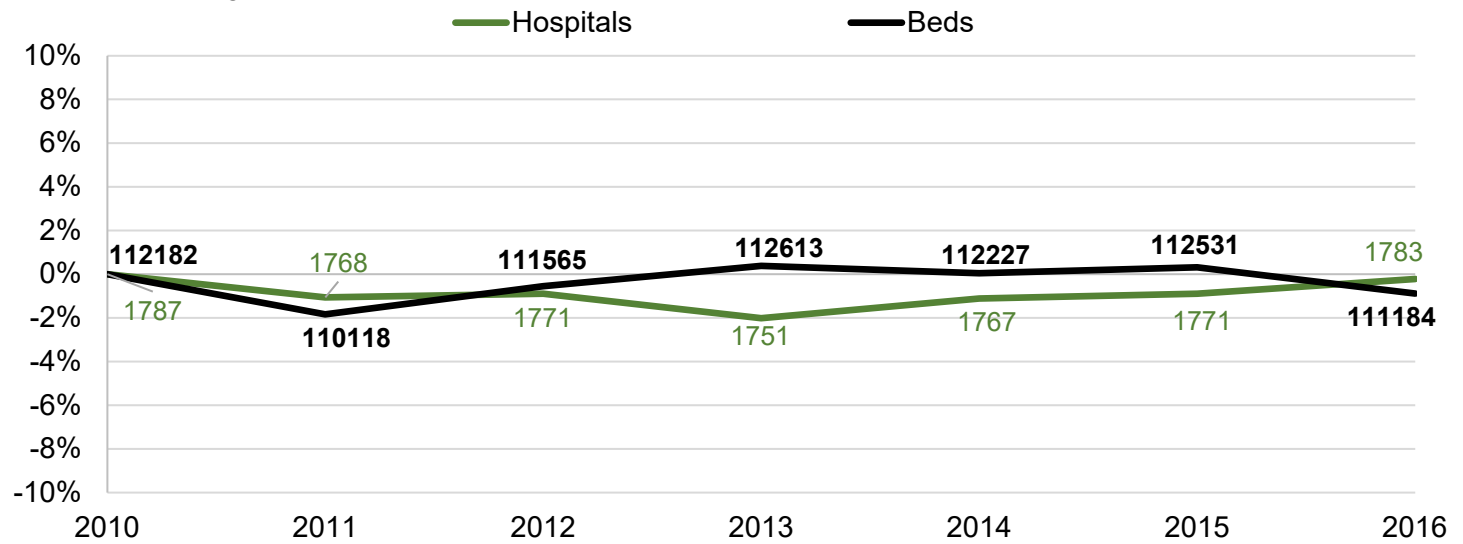

B. Percent Change in Beds by System Ownership

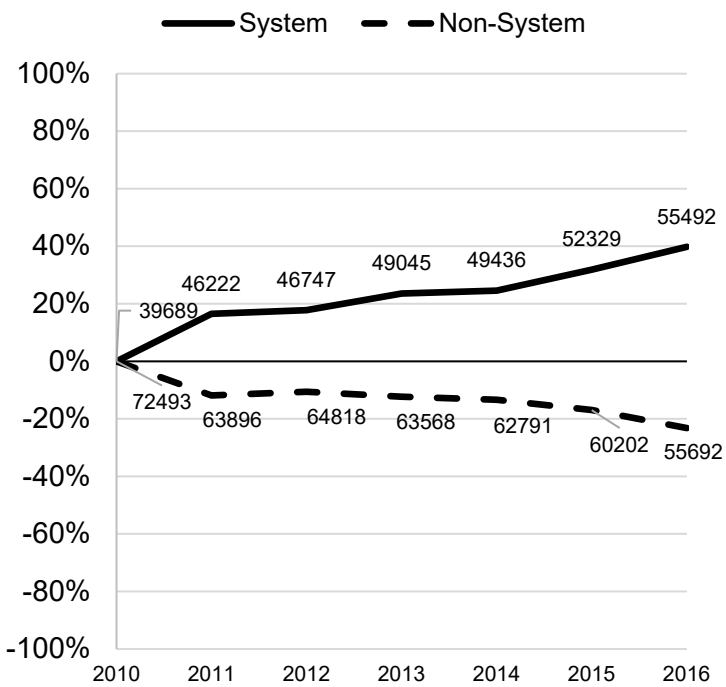

C. Percent Change in Beds by Profit Status

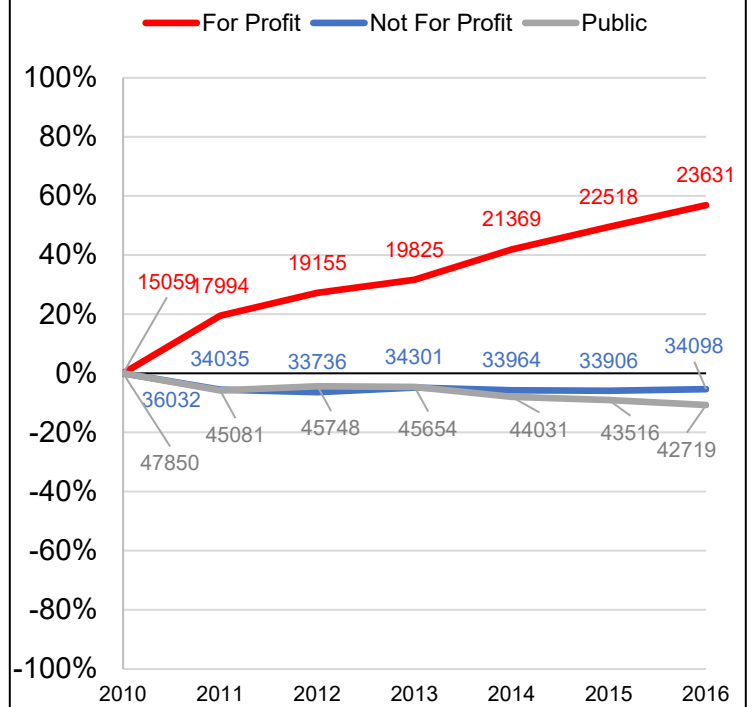

## Supplemental Material B

### Chain Ownership Stratified by Systems and Profit Status, 2010-2016

|                                 | For Profit |                |             | Not For Profit |                |             | Public |                |             | ROW TOTALS |                |
|---------------------------------|------------|----------------|-------------|----------------|----------------|-------------|--------|----------------|-------------|------------|----------------|
|                                 | N          | Column percent | Row percent | N              | Column percent | Row percent | N      | Column percent | Row percent | N          | Column percent |
| <b>Year 2010</b>                |            |                |             |                |                |             |        |                |             |            |                |
| <b>Overall</b>                  |            |                |             |                |                |             |        |                |             |            |                |
| Facilities                      | 282        | 100.0%         | 16.8%       | 968            | 100.0%         | 57.6%       | 430    | 100.0%         | 25.6%       | 1,680      | 100.0%         |
| Beds                            | 15,059     | 100.0%         | 15.2%       | 36,032         | 100.0%         | 36.4%       | 47,850 | 100.0%         | 48.4%       | 98,941     | 100.0%         |
| <b>System-Owned</b>             |            |                |             |                |                |             |        |                |             |            |                |
| Facilities                      | 181        | 64.2%          | 20.9%       | 560            | 57.9%          | 64.6%       | 126    | 29.3%          | 14.5%       | 867        | 51.6%          |
| Beds                            | 10,660     | 70.8%          | 27.0%       | 21,258         | 59.0%          | 53.9%       | 7,555  | 15.8%          | 19.1%       | 39,473     | 39.9%          |
| <b>Chains</b>                   |            |                |             |                |                |             |        |                |             |            |                |
| Facilities                      | 159        | 56.4%          | 45.8%       | 64             | 6.6%           | 18.4%       | 124    | 28.8%          | 35.7%       | 347        | 20.7%          |
| Beds                            | 10,725     | 71.2%          | 28.6%       | 3,534          | 9.8%           | 9.4%        | 23,206 | 48.5%          | 61.9%       | 37,465     | 37.9%          |
| <b>Chain and System</b>         |            |                |             |                |                |             |        |                |             |            |                |
| Facilities                      | 133        | 47.2%          | 63.3%       | 49             | 5.1%           | 23.3%       | 28     | 6.5%           | 13.3%       | 210        | 12.5%          |
| Beds                            | 9,346      | 62.1%          | 63.3%       | 2,857          | 7.9%           | 19.4%       | 2,560  | 5.4%           | 17.3%       | 14,763     | 14.9%          |
| <b>Year 2016</b>                |            |                |             |                |                |             |        |                |             |            |                |
| <b>Overall</b>                  |            |                |             |                |                |             |        |                |             |            |                |
| Facilities                      | 384        | 100.0%         | 22.7%       | 932            | 100.0%         | 55.1%       | 374    | 100.0%         | 22.1%       | 1,690      | 100.0%         |
| Beds                            | 23,631     | 100.0%         | 23.5%       | 34,098         | 100.0%         | 33.9%       | 42,719 | 100.0%         | 42.5%       | 100,448    | 100.0%         |
| <b>System-Owned</b>             |            |                |             |                |                |             |        |                |             |            |                |
| Facilities                      | 228        | 59.4%          | 19.5%       | 772            | 82.8%          | 66.2%       | 167    | 44.7%          | 14.3%       | 1,167      | 69.1%          |
| Beds                            | 14,495     | 61.3%          | 26.2%       | 27,659         | 81.1%          | 49.9%       | 13,272 | 31.1%          | 23.9%       | 55,426     | 55.2%          |
| <b>Chains</b>                   |            |                |             |                |                |             |        |                |             |            |                |
| Facilities                      | 225        | 58.6%          | 56.3%       | 61             | 6.5%           | 15.3%       | 114    | 30.5%          | 28.5%       | 400        | 23.7%          |
| Beds                            | 16,587     | 70.2%          | 37.9%       | 3,803          | 11.2%          | 8.7%        | 23,331 | 54.6%          | 53.4%       | 43,721     | 43.5%          |
| <b>Chain and System</b>         |            |                |             |                |                |             |        |                |             |            |                |
| Facilities                      | 146        | 38.0%          | 60.8%       | 50             | 5.4%           | 20.8%       | 44     | 11.8%          | 18.3%       | 240        | 14.2%          |
| Beds                            | 11,833     | 50.1%          | 51.7%       | 3,133          | 9.2%           | 13.7%       | 7,907  | 18.5%          | 34.6%       | 22,873     | 22.8%          |
| <b>Percent Change 2010-2016</b> |            |                |             |                |                |             |        |                |             |            |                |
| <b>Overall</b>                  |            |                |             |                |                |             |        |                |             |            |                |
| Facilities                      | 36.2%      | 0.0%           | 35.4%       | -3.7%          | 0.0%           | -4.3%       | -13.0% | 0.0%           | -13.5%      | 0.6%       |                |
| Beds                            | 56.9%      | 0.0%           | 54.6%       | -5.4%          | 0.0%           | -6.8%       | -10.7% | 0.0%           | -12.1%      | 1.5%       |                |
| <b>System-Owned</b>             |            |                |             |                |                |             |        |                |             |            |                |
| Facilities                      | 26.0%      | -7.5%          | -6.4%       | 37.9%          | 43.2%          | 2.4%        | 32.5%  | 52.4%          | -1.5%       | 34.6%      |                |
| Beds                            | 36.0%      | -13.3%         | -3.2%       | 30.1%          | 37.5%          | -7.3%       | 75.7%  | 96.8%          | 25.1%       | 40.4%      |                |
| <b>Chains</b>                   |            |                |             |                |                |             |        |                |             |            |                |
| Facilities                      | 41.5%      | 3.9%           | 22.8%       | -4.7%          | -1.0%          | -17.3%      | -8.1%  | 5.7%           | -20.2%      | 15.3%      |                |
| Beds                            | 54.7%      | -1.4%          | 32.5%       | 7.6%           | 13.7%          | -7.8%       | 0.5%   | 12.6%          | -13.8%      | 16.7%      |                |
| <b>Chain and System</b>         |            |                |             |                |                |             |        |                |             |            |                |
| Facilities                      | 9.8%       | -19.4%         | -3.9%       | 2.0%           | 6.0%           | -10.7%      | 57.1%  | 80.7%          | 37.5%       | 14.3%      |                |
| Beds                            | 26.6%      | -19.3%         | -18.3%      | 9.7%           | 15.9%          | -29.2%      | 208.9% | 246.0%         | 99.4%       | 54.9%      |                |

Notes:

Data come from the Health Systems and Provider Database, developed by the National Bureau of Economic Research. The row totals columns do not match exactly the overall counts of psychiatric facilities and beds reported in the paper because ownership information was missing for 107 facilities in 2010 and 93 facilities in 2016.

## Supplemental Material C

|                                                | Overall   |         |           |         |                    |               | System-Owned |        |           |        |                    |               | Freestanding |        |           |        |                    |               |
|------------------------------------------------|-----------|---------|-----------|---------|--------------------|---------------|--------------|--------|-----------|--------|--------------------|---------------|--------------|--------|-----------|--------|--------------------|---------------|
|                                                | 2010      |         | 2016      |         | % change hospitals | % change beds | 2010         |        | 2016      |        | % change hospitals | % change beds | 2010         |        | 2016      |        | % change hospitals | % change beds |
|                                                | Hospitals | Beds    | Hospitals | Beds    |                    |               | Hospitals    | Beds   | Hospitals | Beds   |                    |               | Hospitals    | Beds   | Hospitals | Beds   |                    |               |
| <b>Overall</b>                                 | 1,787     | 112,182 | 1,783     | 111,184 | -0.2%              | -0.9%         | 876          | 39,689 | 1,172     | 55,492 | 33.8%              | 39.8%         | 553          | 71,755 | 596       | 72,440 | 7.8%               | 1.0%          |
| <b>Forensic patients</b>                       | 134       | 23,944  | 160       | 26,614  | 19.4%              | 11.2%         | 36           | 3,401  | 69        | 6,227  | 91.7%              | 83.1%         | 88           | 20,552 | 100       | 22,537 | 13.6%              | 9.7%          |
| <b>Outpatient psychiatric care<sup>a</sup></b> | 675       | 40,161  | 880       | 50,237  | 30.4%              | 25.1%         | 437          | 23,699 | 632       | 32,389 | 44.6%              | 36.7%         | 218          | 22,118 | 274       | 27,673 | 25.7%              | 25.1%         |
| <b>SUD treatment<sup>a</sup></b>               | 853       | 56756   | 875       | 57249   | 2.6%               | 0.9%          | 543          | 28133  | 581       | 29908  | 7.0%               | 6.3%          | 278          | 34880  | 328       | 36762  | 18.0%              | 5.4%          |
| <b>Rural</b>                                   | 106       | 4138    | 96        | 3957    | -9.4%              | -4.4%         | 27           | 528    | 41        | 868    | 51.9%              | 64.4%         | 30           | 2804   | 27        | 2568   | -10.0%             | -8.4%         |
| <b>Region</b>                                  |           |         |           |         |                    |               |              |        |           |        |                    |               |              |        |           |        |                    |               |
| Midwest                                        | 437       | 21558   | 448       | 22410   | 2.5%               | 4.0%          | 226          | 8396   | 294       | 10339  | 30.1%              | 23.1%         | 111          | 11948  | 128       | 12783  | 15.3%              | 7.0%          |
| Northeast                                      | 418       | 28487   | 398       | 25746   | -4.8%              | -9.6%         | 198          | 10273  | 298       | 17783  | 50.5%              | 73.1%         | 108          | 16852  | 97        | 14532  | -10.2%             | -13.8%        |
| South                                          | 661       | 42344   | 672       | 42379   | 1.7%               | 0.1%          | 307          | 14580  | 399       | 19130  | 30.0%              | 31.2%         | 243          | 29181  | 273       | 30088  | 12.3%              | 3.1%          |
| West                                           | 271       | 19793   | 265       | 20649   | -2.2%              | 4.3%          | 145          | 6440   | 181       | 8240   | 24.8%              | 28.0%         | 91           | 13774  | 98        | 15037  | 7.7%               | 9.2%          |
| <b>Size</b>                                    |           |         |           |         |                    |               |              |        |           |        |                    |               |              |        |           |        |                    |               |
| <10 beds                                       | 108       | 961     | 91        | 734     | -15.7%             | -23.6%        | 45           | 374    | 64        | 483    | 42.2%              | 29.1%         | 5            | 41     | 1         | 10     | -80.0%             | -75.6%        |
| 11-20 beds                                     | 442       | 7253    | 425       | 6928    | -3.8%              | -4.5%         | 203          | 3359   | 294       | 4801   | 44.8%              | 42.9%         | 59           | 967    | 55        | 908    | -6.8%              | -6.1%         |
| 21-30 beds                                     | 318       | 8084    | 289       | 7330    | -9.1%              | -9.3%         | 174          | 4432   | 225       | 5678   | 29.3%              | 28.1%         | 41           | 1091   | 34        | 876    | -17.1%             | -19.7%        |
| 31-50 beds                                     | 298       | 11846   | 295       | 11692   | -1.0%              | -1.3%         | 171          | 6731   | 208       | 8144   | 21.6%              | 21.0%         | 46           | 1936   | 65        | 2708   | 41.3%              | 39.9%         |
| >50 beds                                       | 561       | 84038   | 594       | 84500   | 5.9%               | 0.5%          | 248          | 24793  | 317       | 36386  | 27.8%              | 46.8%         | 369          | 67720  | 401       | 67938  | 8.7%               | 0.3%          |
| <b>Has an emergency department</b>             | 633       | 24529   | 1,196     | 44951   | 88.9%              | 83.3%         | 369          | 15238  | 980       | 36599  | 165.6%             | 140.2%        | 39           | 3074   | 64        | 7898   | 64.1%              | 156.9%        |

Notes:  
<sup>a</sup>This variable was not available for 2010. Therefore, for this variable, the numbers displayed under the 2010 column reflect the year 2011.
